# Supplementary material for: MoS2-based composite nanozymes with superior peroxidase-like activity for ultrasensitive SERS detection of glucose
Source: Royal Society of Chemistry journal article supplement (doi:10.1039/d1nj02451e), 2021-01-01
Supplement: d1nj02451e2.pdf [file d1nj02451e2.pdf]

New Journal of Chemistry

## Supporting Information

### MoS<sub>2</sub>-based composite nanozymes with superior peroxidase-like activity for ultrasensitive SERS detection of glucose

Yaoyu Tan, Huan Jiang, Baihui Wang, Xia Zhang\*

School of Materials Engineering, Shanghai University of Engineering Science,  
Shanghai, 201620, China

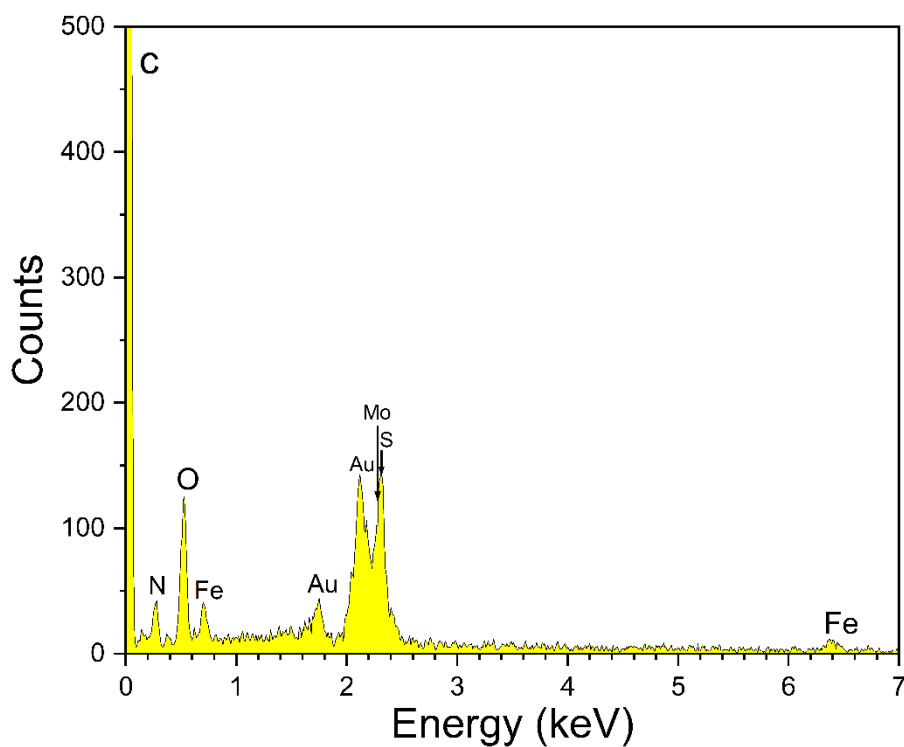

Figure S1. The EDS spectra of the PANI@MoS<sub>2</sub>@Fe<sub>3</sub>O<sub>4</sub>@Au nanocomposites.

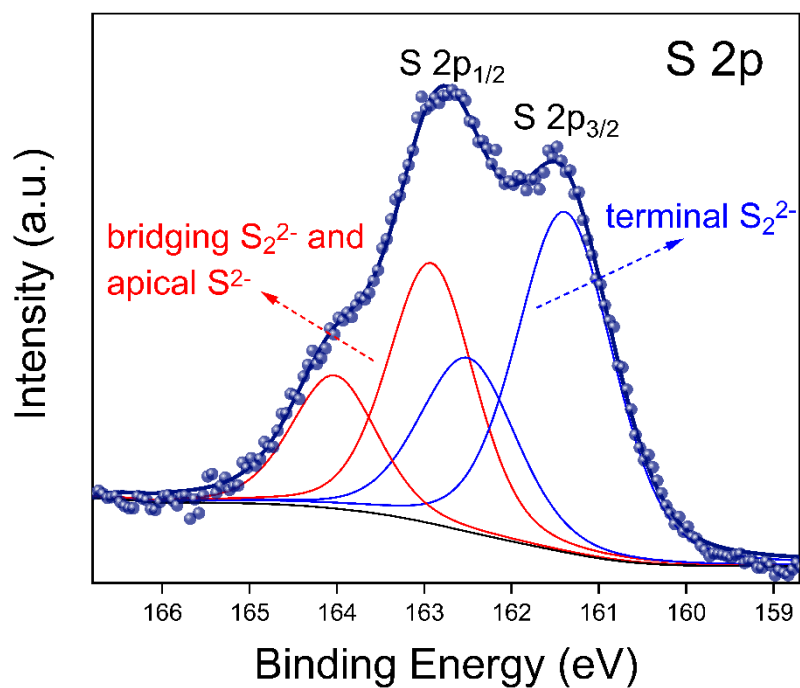

**Figure S2.** XPS spectra of S 2p of the PANI@MoS<sub>2</sub>@Fe<sub>3</sub>O<sub>4</sub>@Au nanozymes.

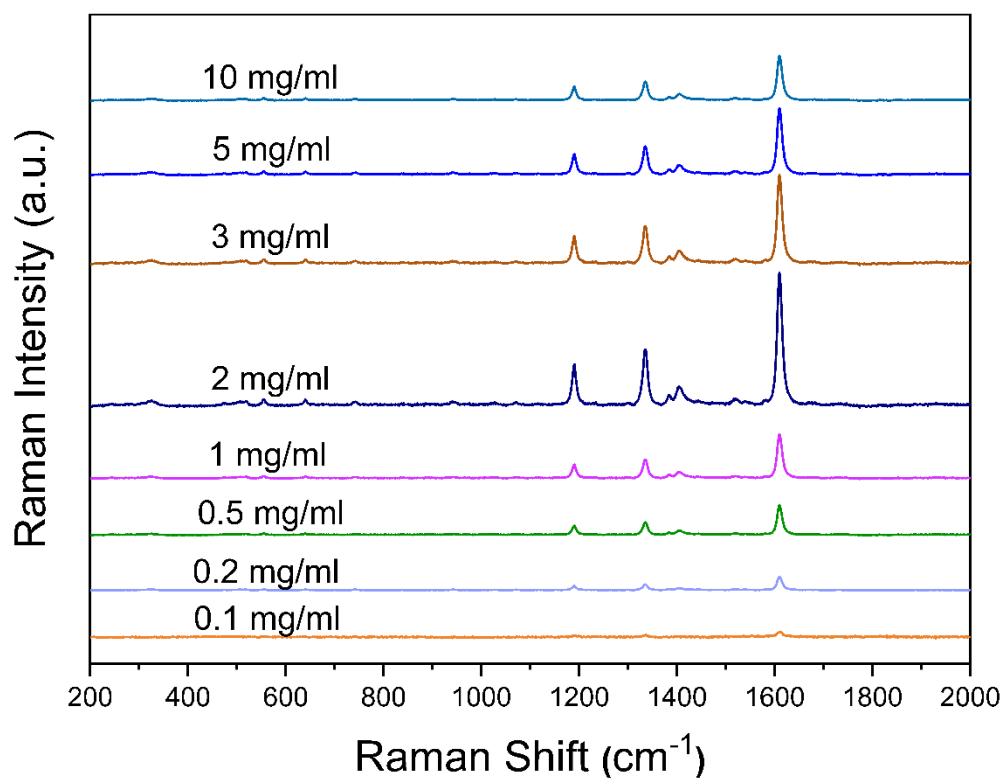

**Figure S3.** The SERS spectra of TMB molecules during the reaction on the surface of PANI@MoS<sub>2</sub>@Fe<sub>3</sub>O<sub>4</sub>@Au nanozymes prepared at different concentrations of HAuCl<sub>4</sub>. [PANI@MoS<sub>2</sub>@Fe<sub>3</sub>O<sub>4</sub>@Au] = 10  $\mu$ L (100  $\mu$ g·mL<sup>-1</sup>); [TMB] = 10  $\mu$ L (1 mM); [H<sub>2</sub>O<sub>2</sub>] = 10  $\mu$ L (10<sup>-5</sup> M).

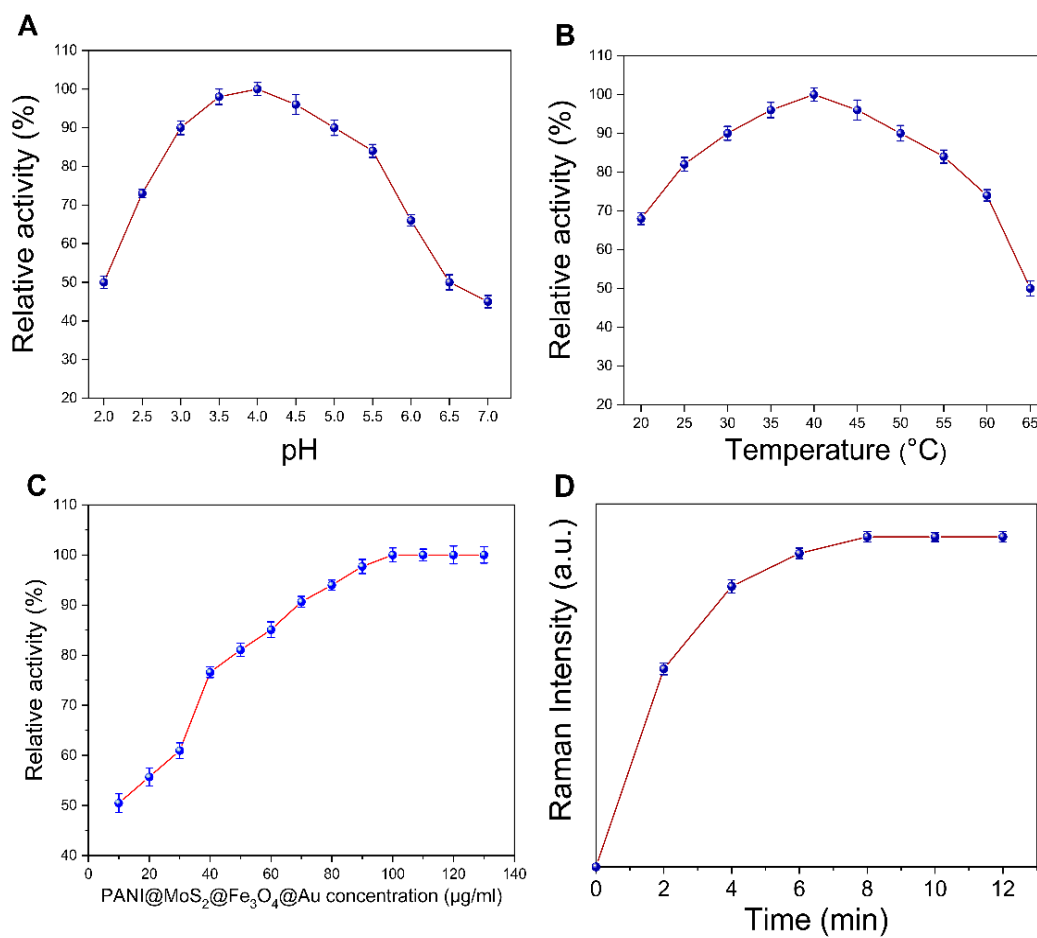

**Figure S4.** Peroxidase activities under varied reaction conditions. (A) A pH-dependent response curve is performed at pH 2.0-7.0. (B) Temperature (20°C, 25°C, 30°C, 35°C, 40°C, 45°C, 50°C, 55°C, 60°C, 65°C). (C) Effect of PANI@MoS<sub>2</sub>@Fe<sub>3</sub>O<sub>4</sub>@Au concentration on catalytic efficiency (10, 20, 30, 40, 50, 60, 70, 80, 90, 100, 110, 120, 130 mg·mL<sup>-1</sup>), and (C) Dependence of the peroxidase-like activity on time (0, 2, 4, 6, 8, 10, 12 min). (D) System reaction changes with time (0, 2, 4, 6, 8, 10, 12 min). Error bars represent the standard error derived from three repeated measurements.

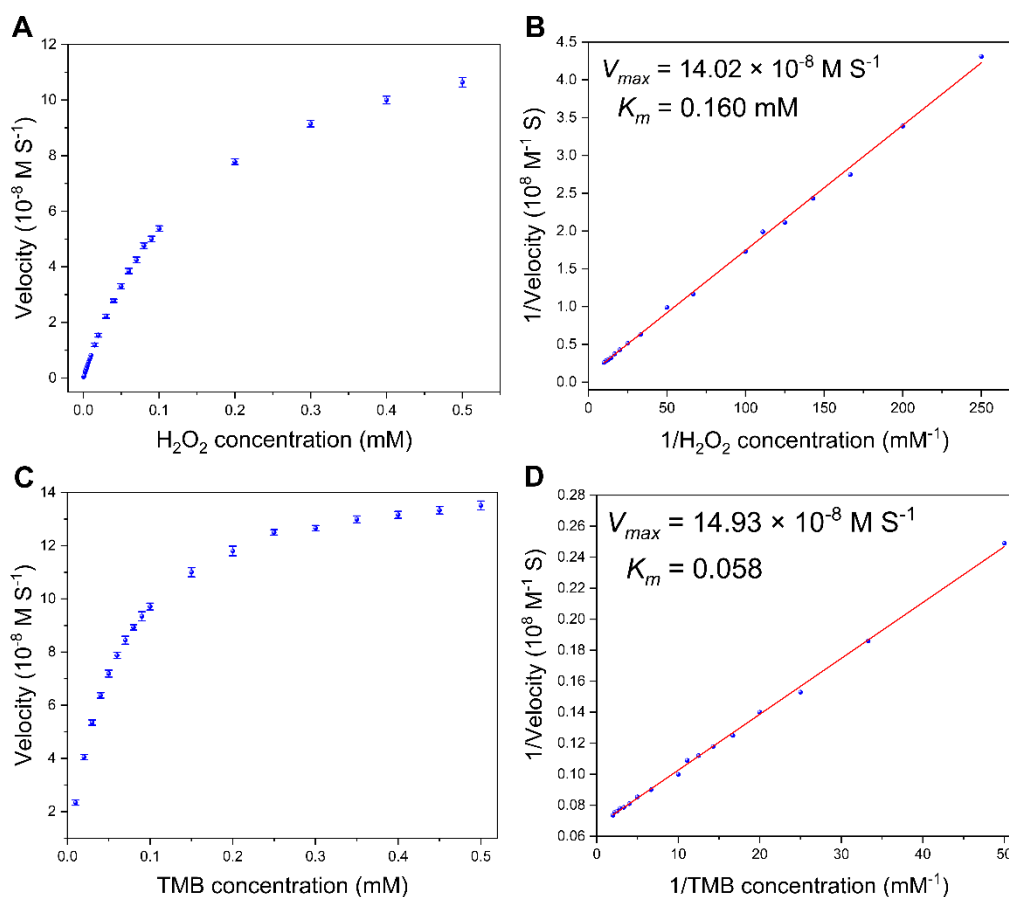

**Figure S5.** UV-vis-kinetic assays of the PANI@MoS<sub>2</sub>@Fe<sub>3</sub>O<sub>4</sub>@Au nanozymes. (A) Plots of the velocity of the reaction versus different concentrations of H<sub>2</sub>O<sub>2</sub> (0.5 mM TMB). (B) Lineweaver-Burk plots of the velocity versus varying concentration of H<sub>2</sub>O<sub>2</sub>. (C) Plots of the velocity of the reaction versus different concentrations of TMB (1 mM H<sub>2</sub>O<sub>2</sub>). (D) Lineweaver-Burk plots of the velocity versus varying concentration of TMB.

**Table S1.** Comparison of the kinetic parameters with natural enzyme and other nanocatalysts.

| Nanocatalysts                                             | Substrates                    | $K_m$ (mM) | $V_{max}$ ( $10^{-8}$ M·s <sup>-1</sup> ) | Ref.      |
|-----------------------------------------------------------|-------------------------------|------------|-------------------------------------------|-----------|
| HRP                                                       | TMB                           | 0.434      | 10.0                                      | 1         |
|                                                           | H <sub>2</sub> O <sub>2</sub> | 3.7        | 8.71                                      |           |
| Fe <sub>3</sub> O <sub>4</sub>                            | TMB                           | 0.098      | 3.44                                      | 1         |
|                                                           | H <sub>2</sub> O <sub>2</sub> | 154        | 9.78                                      |           |
| MoS <sub>2</sub>                                          | TMB                           | 2.668      | 1.501                                     | 2         |
|                                                           | H <sub>2</sub> O <sub>2</sub> | 1.809      | 1.642                                     |           |
| NiFe <sub>2</sub> O <sub>4</sub>                          | TMB                           | 0.55       | 4.57                                      | 3         |
|                                                           | H <sub>2</sub> O <sub>2</sub> | 2.6        | 14.11                                     |           |
| Fe <sub>2</sub> O <sub>3</sub> Mesoporous                 | TMB                           | 0.298      | 7.36                                      | 4         |
|                                                           | H <sub>2</sub> O <sub>2</sub> | 146.7      | 6.37                                      |           |
| CuO                                                       | TMB                           | 25         | 10.49                                     | 5         |
|                                                           | H <sub>2</sub> O <sub>2</sub> | 400        | 16.1                                      |           |
| Fe <sub>3</sub> O <sub>4</sub> @C                         | TMB                           | 0.20       | 1.34                                      | 6         |
|                                                           | H <sub>2</sub> O <sub>2</sub> | 0.23       | 2.41                                      |           |
| MoS <sub>2</sub> @MgFe <sub>2</sub> O <sub>4</sub>        | TMB                           | 0.806      | 141.3                                     | 7         |
|                                                           | H <sub>2</sub> O <sub>2</sub> | 0.238      | 37.8                                      |           |
| GO-Fe <sub>3</sub> O <sub>4</sub>                         | TMB                           | 0.43       | 13.08                                     | 8         |
|                                                           | H <sub>2</sub> O <sub>2</sub> | 0.71       | 5.31                                      |           |
| MoS <sub>2</sub> -PPy-Pd                                  | TMB                           | 0.93       | -                                         | 9         |
|                                                           | H <sub>2</sub> O <sub>2</sub> | 6.4        | -                                         |           |
| PANI@MoS <sub>2</sub> @Fe <sub>3</sub> O <sub>4</sub> @Au | TMB                           | 0.054      | 14.87                                     | This work |
|                                                           | H <sub>2</sub> O <sub>2</sub> | 0.159      | 13.83                                     |           |

**Table S2.** Comparisons of various nanomaterial-based biosensors for glucose.

| Target  | Detection techniques | Nanomaterial                                              | Linear range                              | LOD                      | Ref.      |
|---------|----------------------|-----------------------------------------------------------|-------------------------------------------|--------------------------|-----------|
| glucose | VL                   | AuNPs-MWCNT-IL/GCE                                        | 5-120 $\mu$ M                             | 2 $\mu$ M                | 10        |
| glucose | FL                   | CeO <sub>2</sub> NPs                                      | 10-200 $\mu$ M                            | 8.9 $\mu$ M              | 11        |
| glucose | CL&SERS              | Au@Ag NPs                                                 | 0.5-400 $\mu$ M                           | 0.02 $\mu$ M             | 12        |
| glucose | EC                   | Ag NP-graphene                                            | 2000-1 $\times$ 10 <sup>4</sup> $\mu$ M   | 100 $\mu$ M              | 13        |
| glucose | EC                   | Au NPs-CNTs/3DF                                           | 50-2000 $\mu$ M                           | 1.07 $\mu$ M             | 14        |
| glucose | SERS                 | PANI@MoS <sub>2</sub> @Fe <sub>3</sub> O <sub>4</sub> @Au | 10 <sup>-5</sup> -10 <sup>3</sup> $\mu$ M | 10 <sup>-6</sup> $\mu$ M | this work |

VL: Voltammetry. FL: Fluorimetry. CL: Colorimetry. SERS: Surface-enhanced Raman scattering. EC:

Electrochemistry.

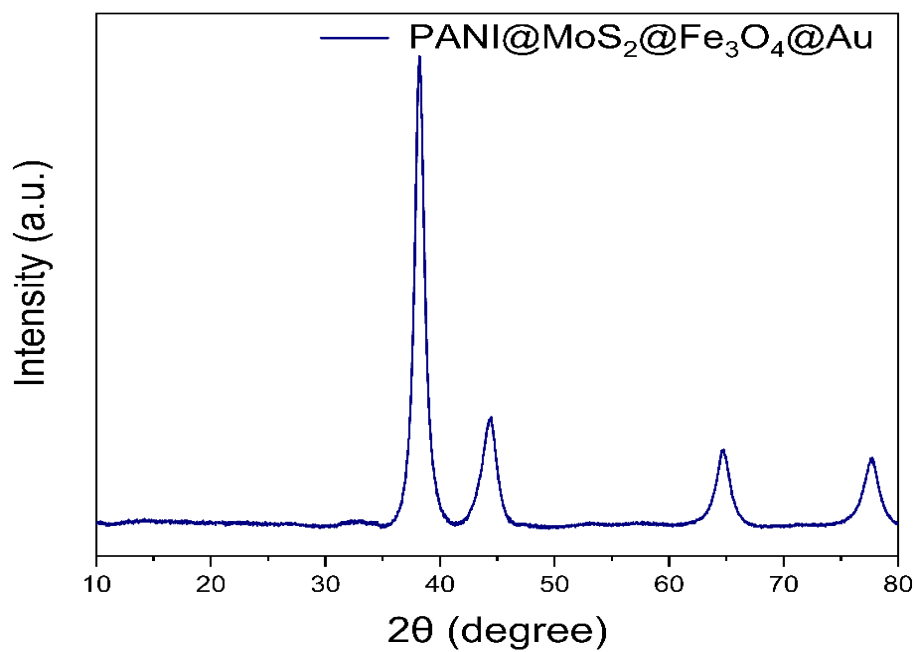

**Figure S6.** XRD patterns of PANI@MoS<sub>2</sub>@Fe<sub>3</sub>O<sub>4</sub>@Au nanozyme after 7 days in PBS.

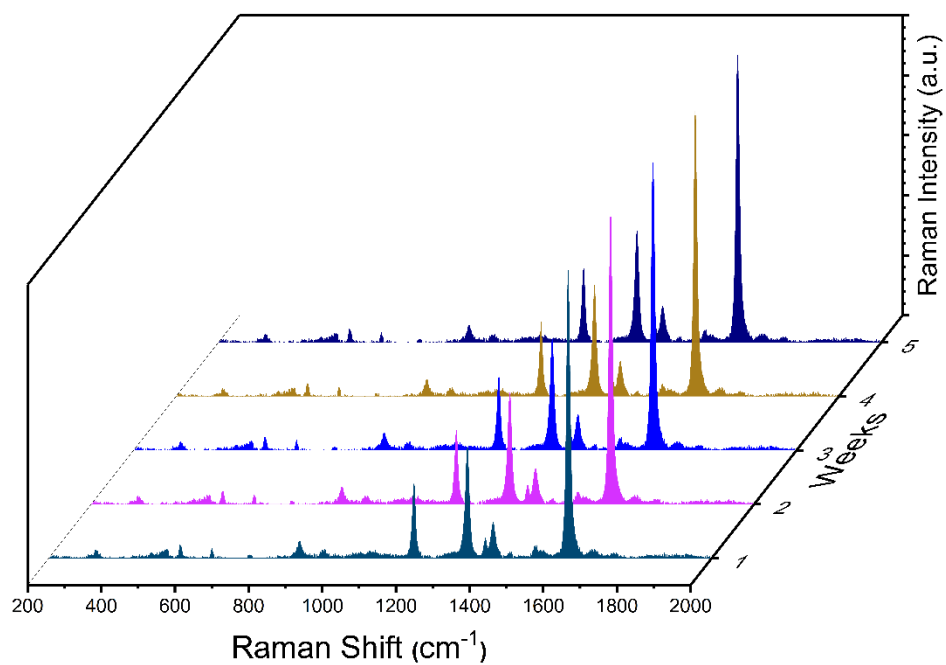

**Figure S7.** SERS spectra of glucose ( $10^{-5}$  M) determination of PANI@MoS<sub>2</sub>@Fe<sub>3</sub>O<sub>4</sub>@Au nanozymes in 5 weeks.

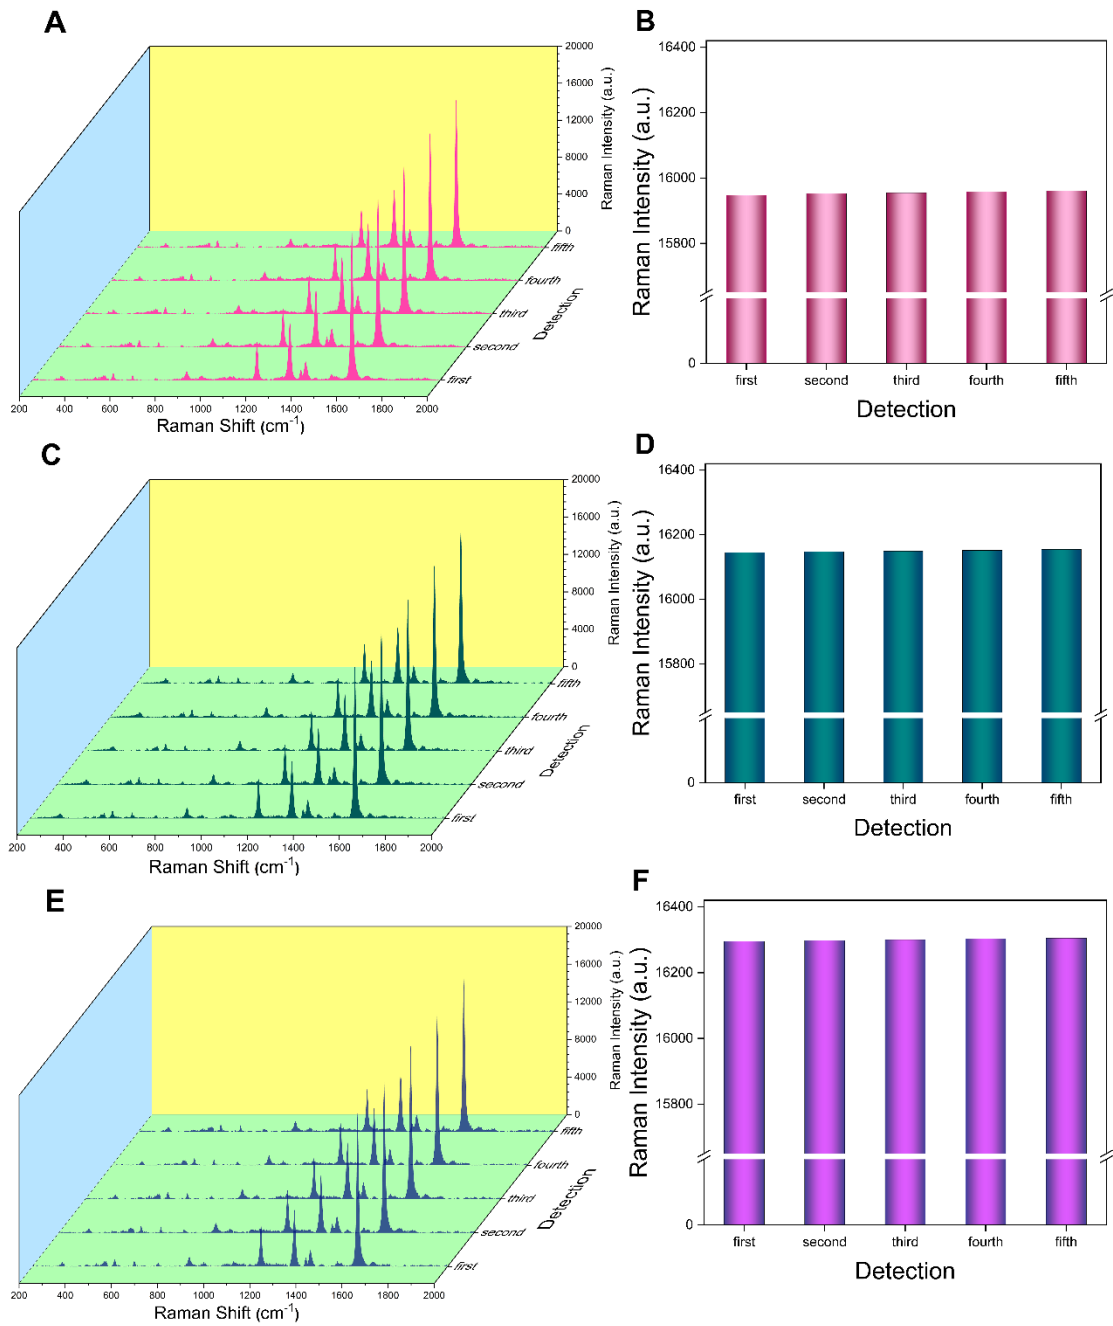

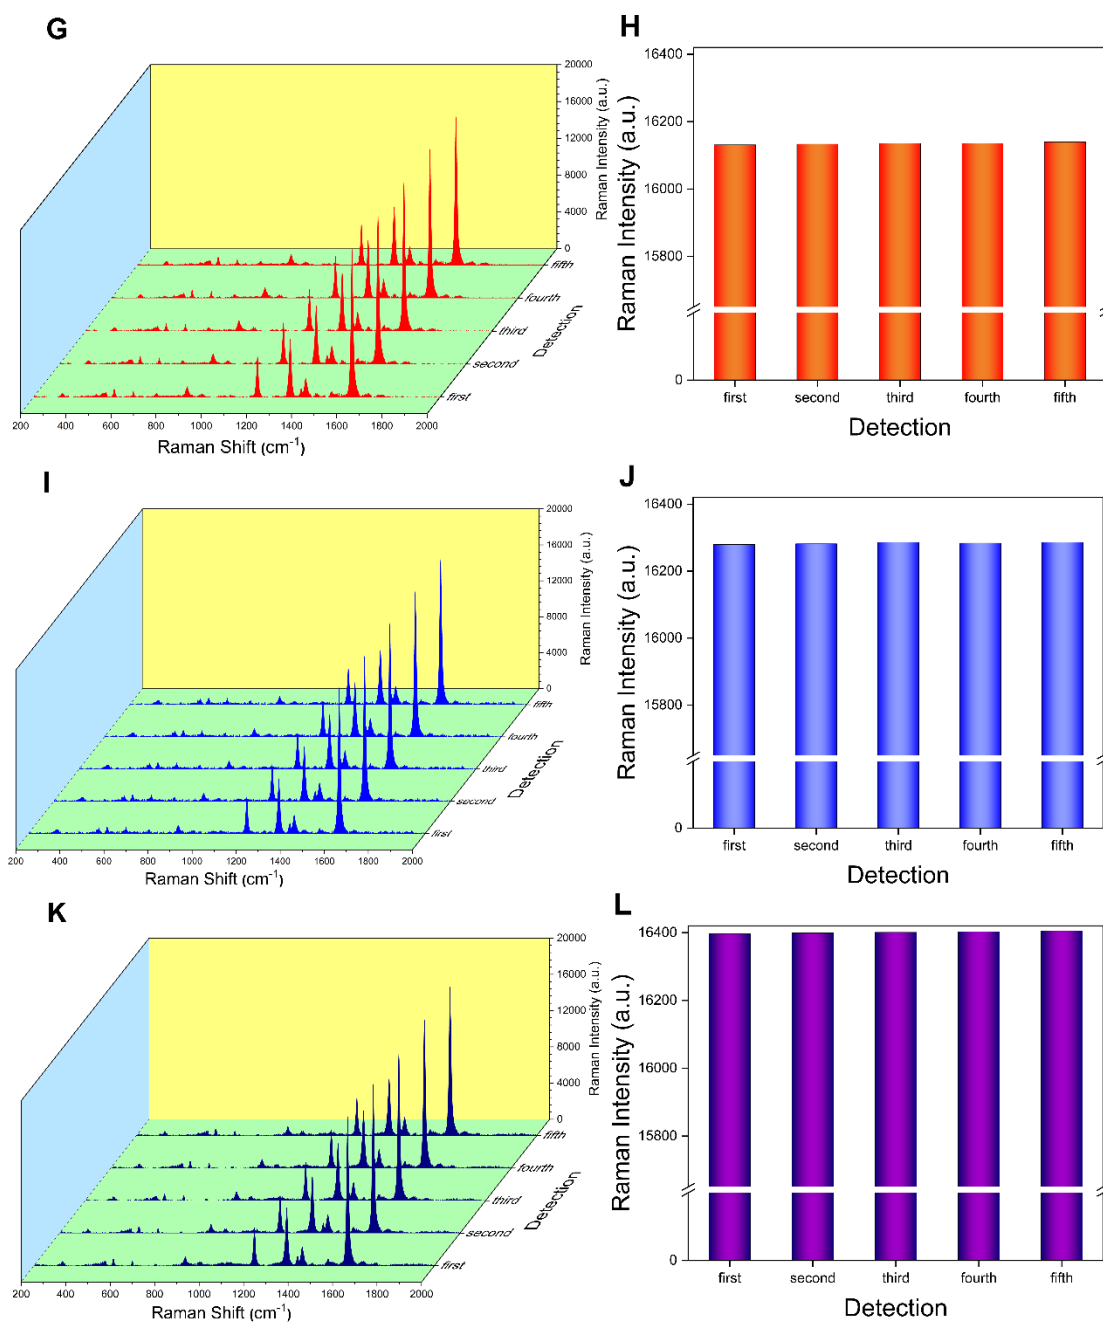

**Figure S8.** The Raman spectrum of the glucose content of human serum sample 1 after the addition of the value [ (A) 2 mM, (C) 4 mM, (E) 6 mM ] determined by the SERS method and the corresponding intensity histogram at 1609 cm<sup>-1</sup> [ (B) 2 mM, (D) 4 mM, (F) 6 mM ]. Sample 1 is a human serum with a glucose concentration of 3.28 mM. The Raman spectrum of the glucose content of human serum sample 2 after the addition of the value [ (G) 2 mM, (I) 4 mM, (K) 6 mM ] determined by the SERS method and the corresponding intensity histogram at 1609 cm<sup>-1</sup> [ (H) 2 mM, (J) 4 mM, (L) 6 mM ]. Sample 2 is a human serum with a glucose concentration of 5.12 mM.



## Supporting References

1. L. Gao, J. Zhuang, L. Nie, J. Zhang, Y. Zhang, N. Gu, T. Wang, J. Feng, D. Yang, S. Perrett and X. Yan, *Nature Nanotechnology*, 2007, **2**, 577-583.
2. W. Dong, G. Chen, X. Hu, X. Zhang, W. Shi and Z. Fu, *Sensors and Actuators B: Chemical*, 2020, **305**, 127530: 127531-127510.
3. L. Su, W. Qin, H. Zhang, Z. U. Rahman, C. Ren, S. Ma and X. Chen, *Biosensors and Bioelectronics*, 2015, **63**, 384-391.
4. R. Bhattacharjee, S. Tanaka, S. Moriam, M. K. Masud, J. Lin, S. M. Alshehri, T. Ahamad, R. R. Salunkhe, N.-T. Nguyen, Y. Yamauchi, M. S. A. Hossain and M. J. A. Shiddiky, *Journal of Materials Chemistry B*, 2018, **6**, 4783-4791.
5. A. P. Nagvenkar and A. Gedanken, *ACS Applied Materials & Interfaces*, 2016, **8**, 22301-22308.
6. R. Zhang, N. Lu, J. Zhang, R. Yan, J. Li, L. Wang, N. Wang, M. Lv and M. Zhang, *Biosensors and Bioelectronics*, 2020, **150**, 111881: 111881-111889.
7. Y. Zhang, Z. Zhou, F. Wen, J. Tan, T. Peng, B. Luo, H. Wang and S. Yin, *Sensors and Actuators B: Chemical*, 2018, **275**, 155-162.
8. Y. l. Dong, H. g. Zhang, Z. U. Rahman, L. Su, X. j. Chen, J. Hu and X. g. Chen, *Nanoscale*, 2012, **4**, 3969-3976.
9. M. Chi, Y. Zhu, L. Jing, C. Wang and X. Lu, *Analytica Chimica Acta*, 2018, **1035**, 146-153.
10. H. Zhu, X. Lu, M. Li, Y. Shao and Z. Zhu, *Talanta*, 2009, **79**, 1446-1453.
11. B. Liu, Z. Sun, P. J. Huang and J. Liu, *Journal of the American Chemical Society*, 2015, **137**, 1290-1295.
12. Y. Zhong, X. Yu, W. Fu, Y. Chen, G. Shan and Y. Liu, *Microchimica Acta*, 2019, **186**, 802.
13. Y. Zhang, S. Liu, L. Wang, X. Qin, J. Tian, W. Lu, G. Chang and X. Sun, *RSC Advances*, 2012, **2**, 538-545.
14. L. G. Bach, M. L. N. Thi, Q. B. Bui and H. T. Nhac-Vu, *Materials Research Bulletin*, 2019, **118**, 110504.
