# Supplementary figures and images for: MoS2-based composite nanozymes with superior peroxidase-like activity for ultrasensitive SERS detection of glucose
Source: Royal Society of Chemistry journal article supplement (doi:10.1039/d1nj02451e), 2021-01-01

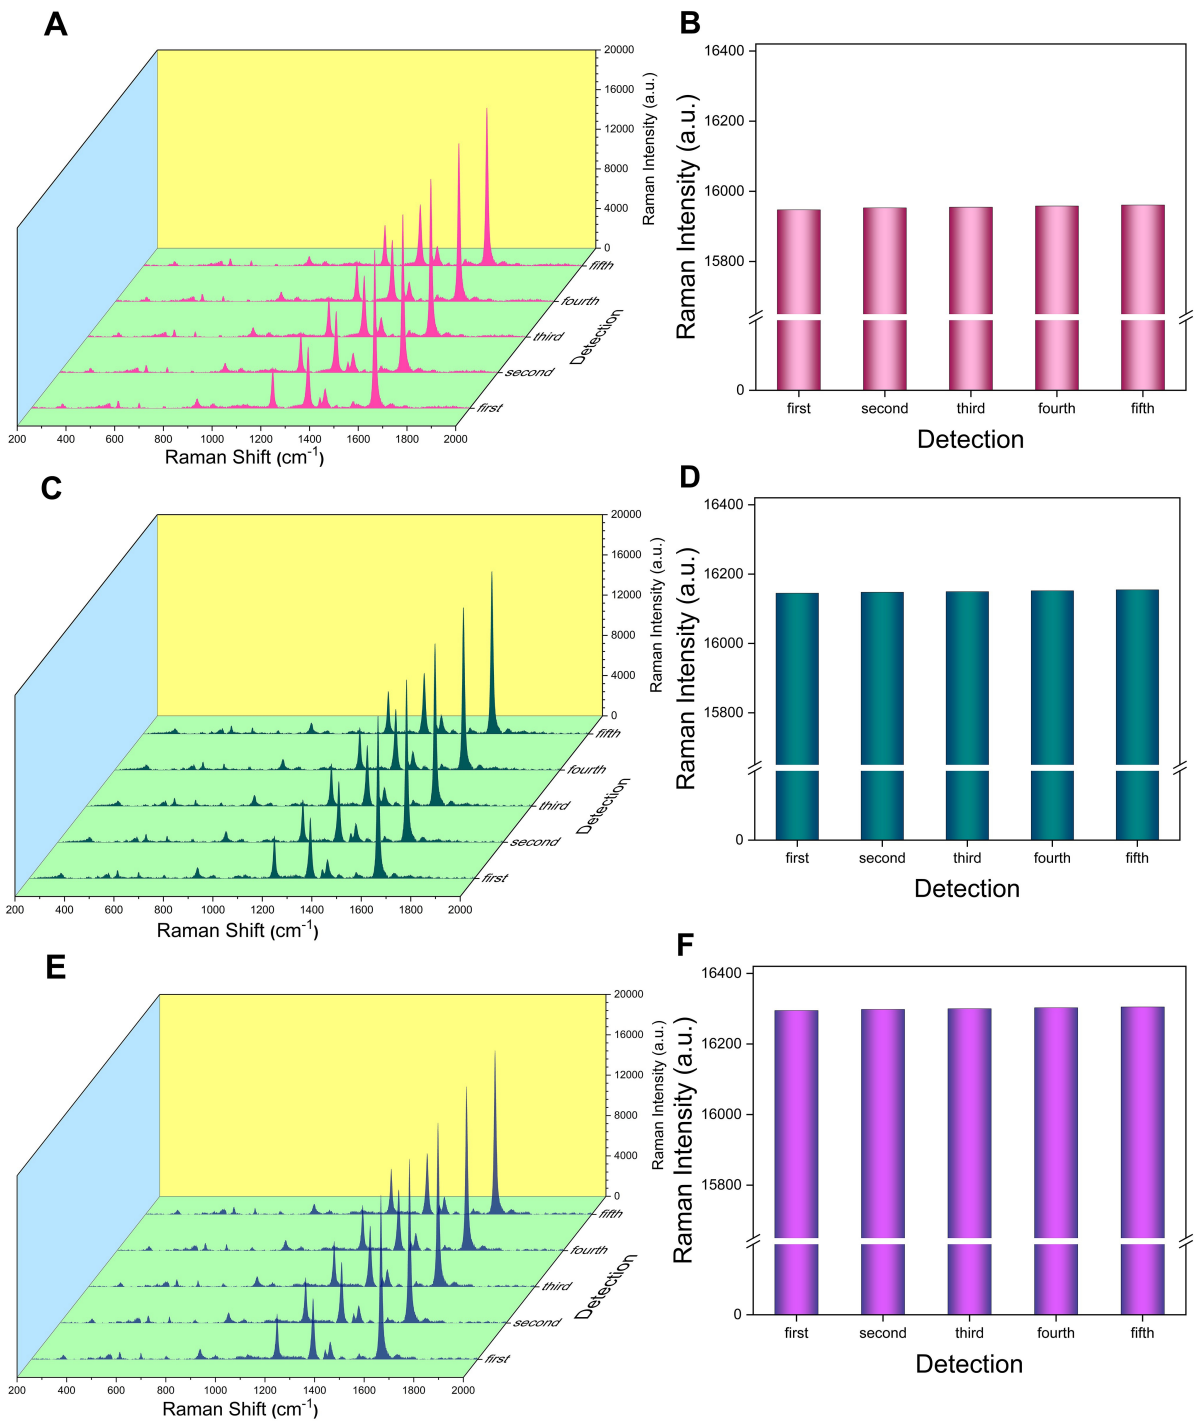

Supplement: d1nj02451e10.pdf [file d1nj02451e10.pdf]

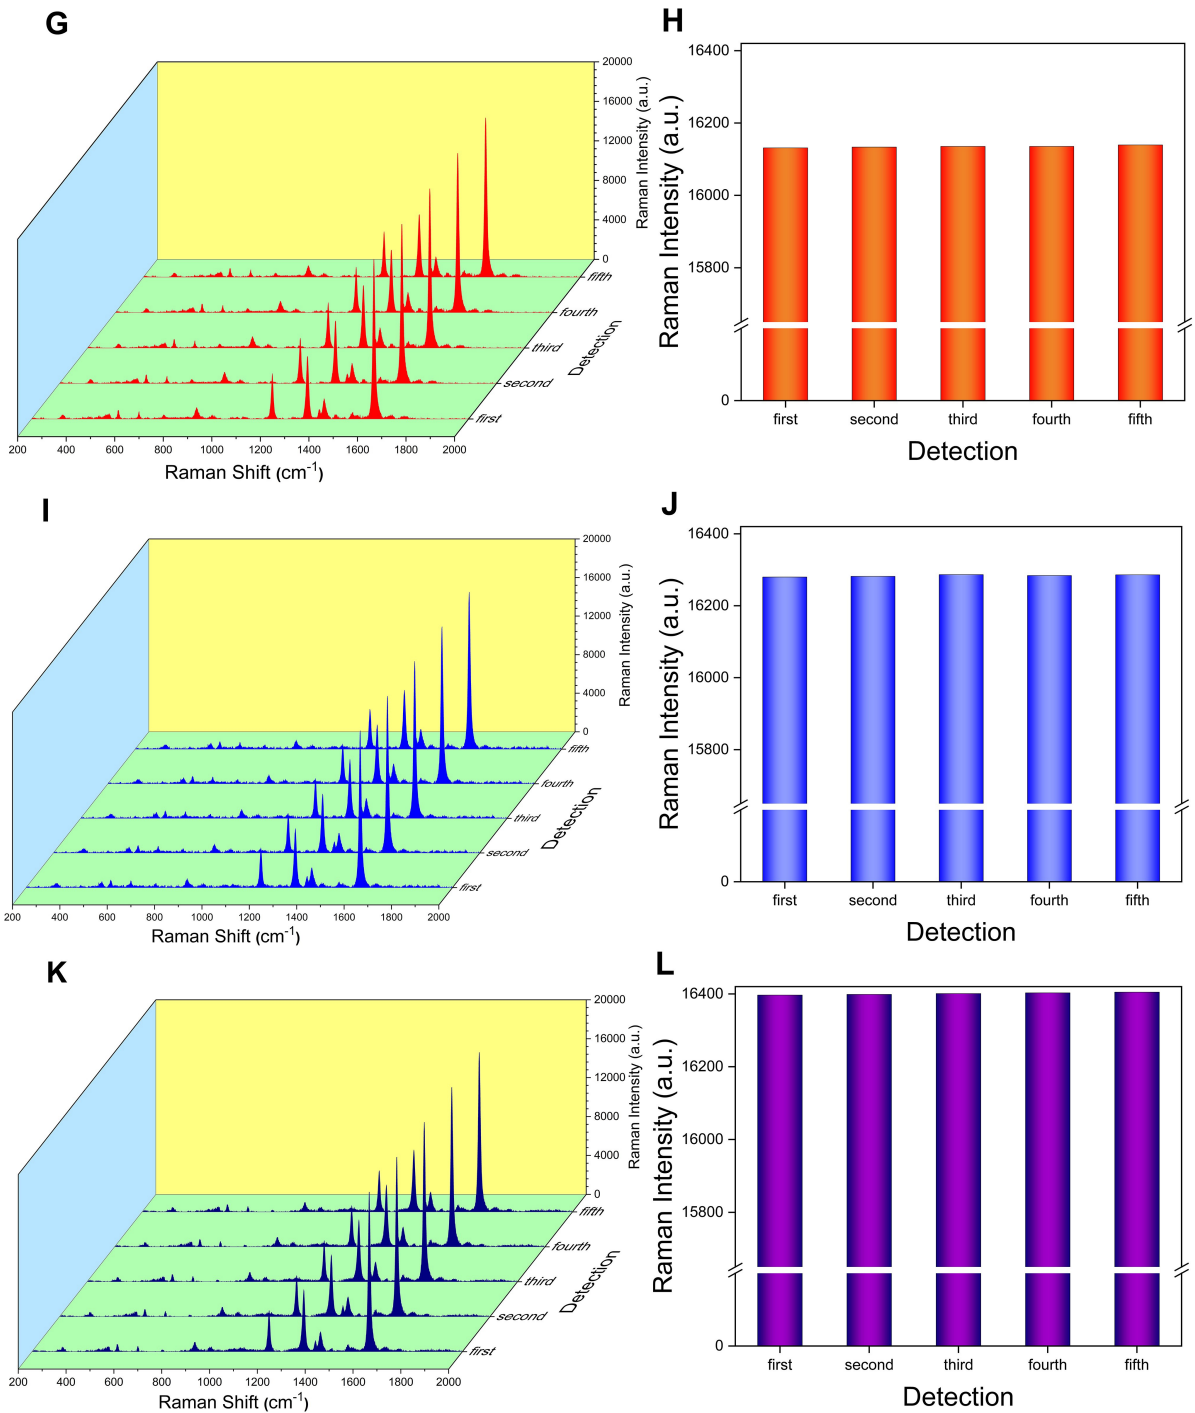

Supplement: d1nj02451e11.pdf [file d1nj02451e11.pdf]

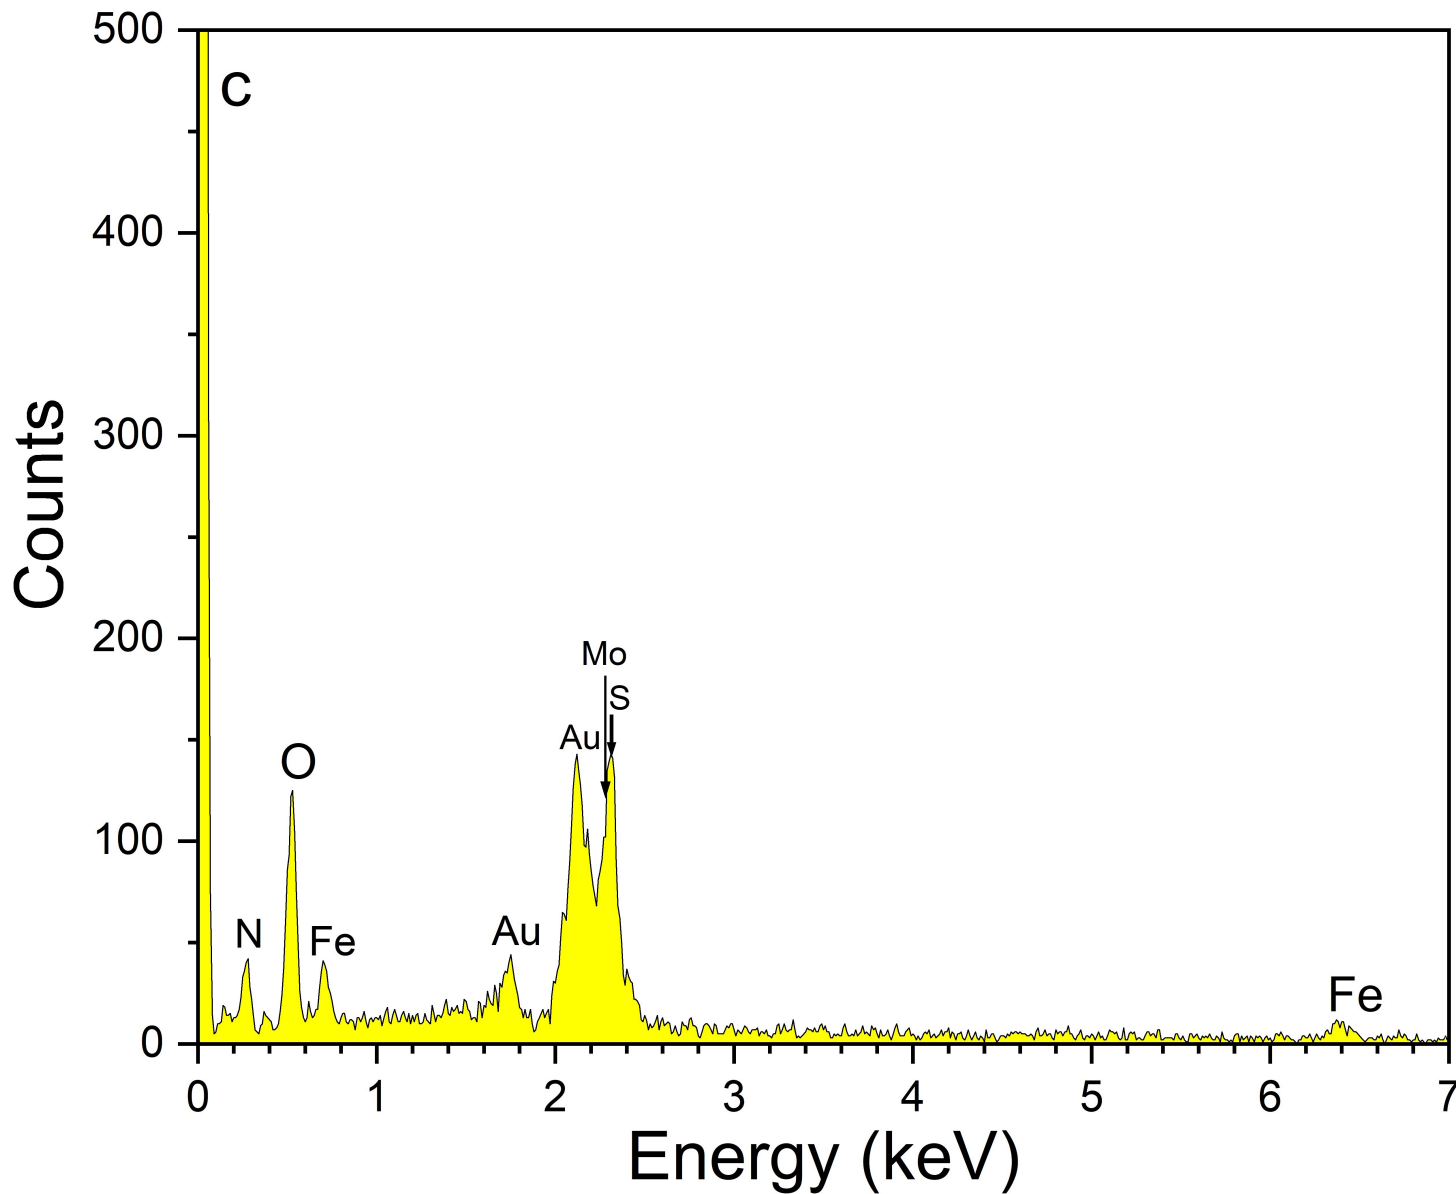

Supplement: d1nj02451e3.pdf [file d1nj02451e3.pdf]

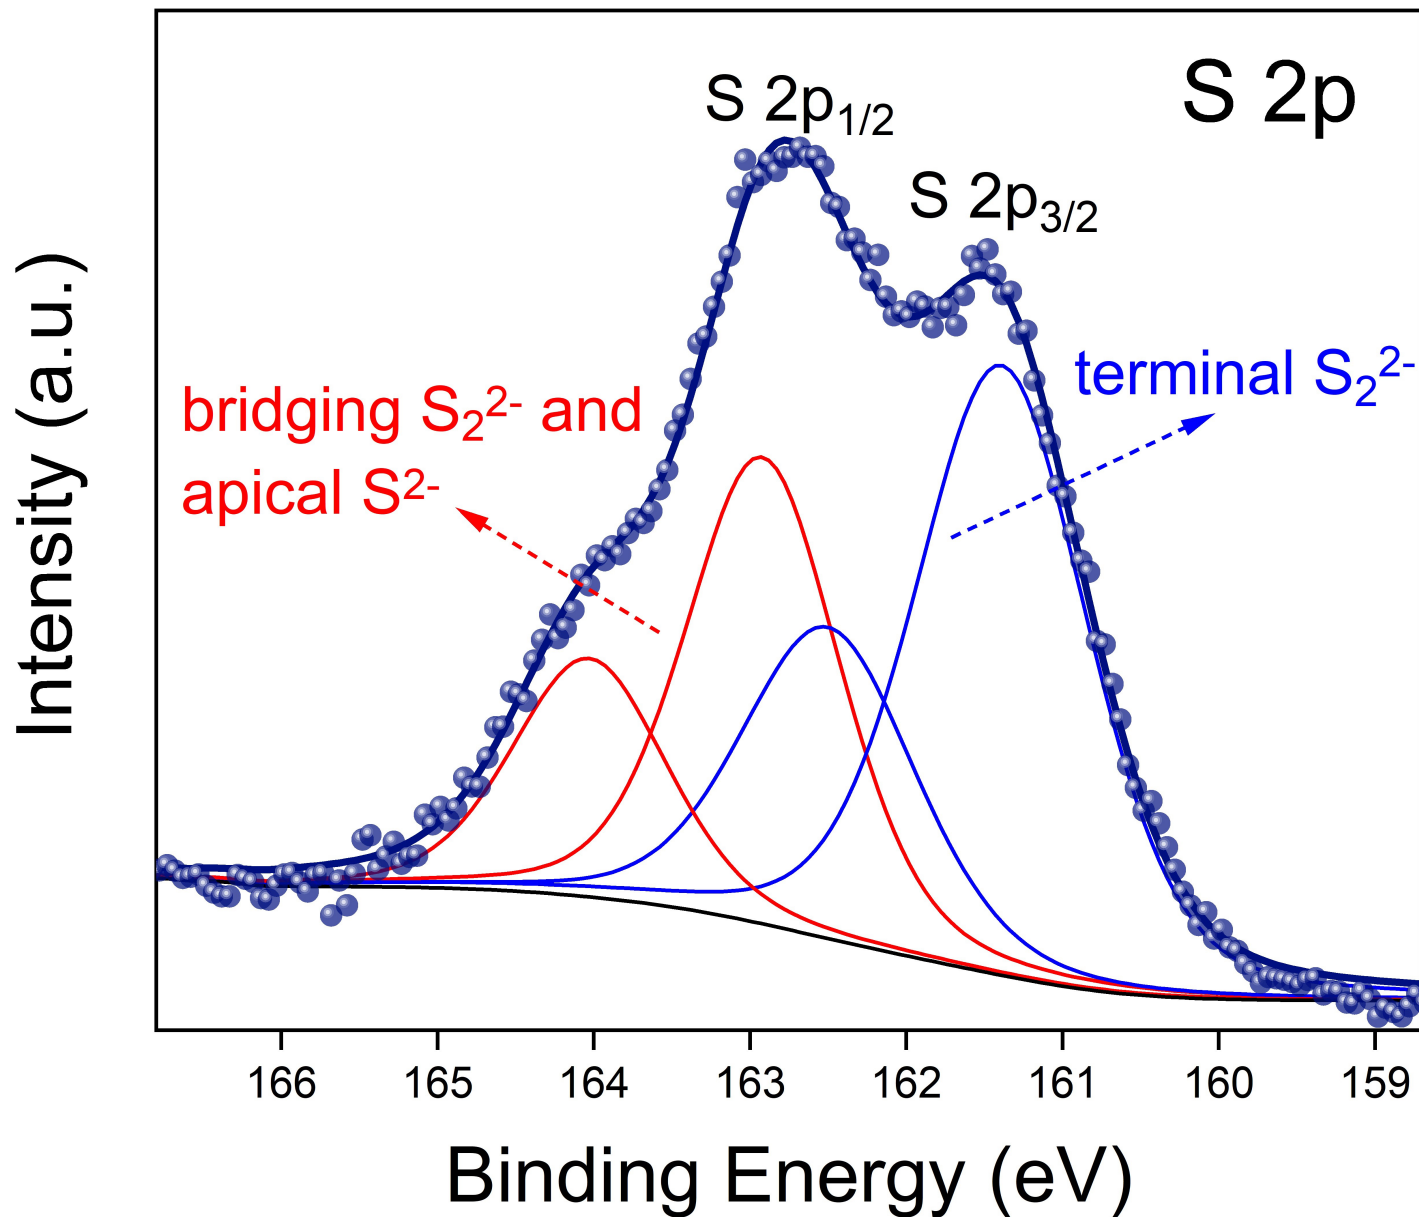

Supplement: d1nj02451e4.pdf [file d1nj02451e4.pdf]

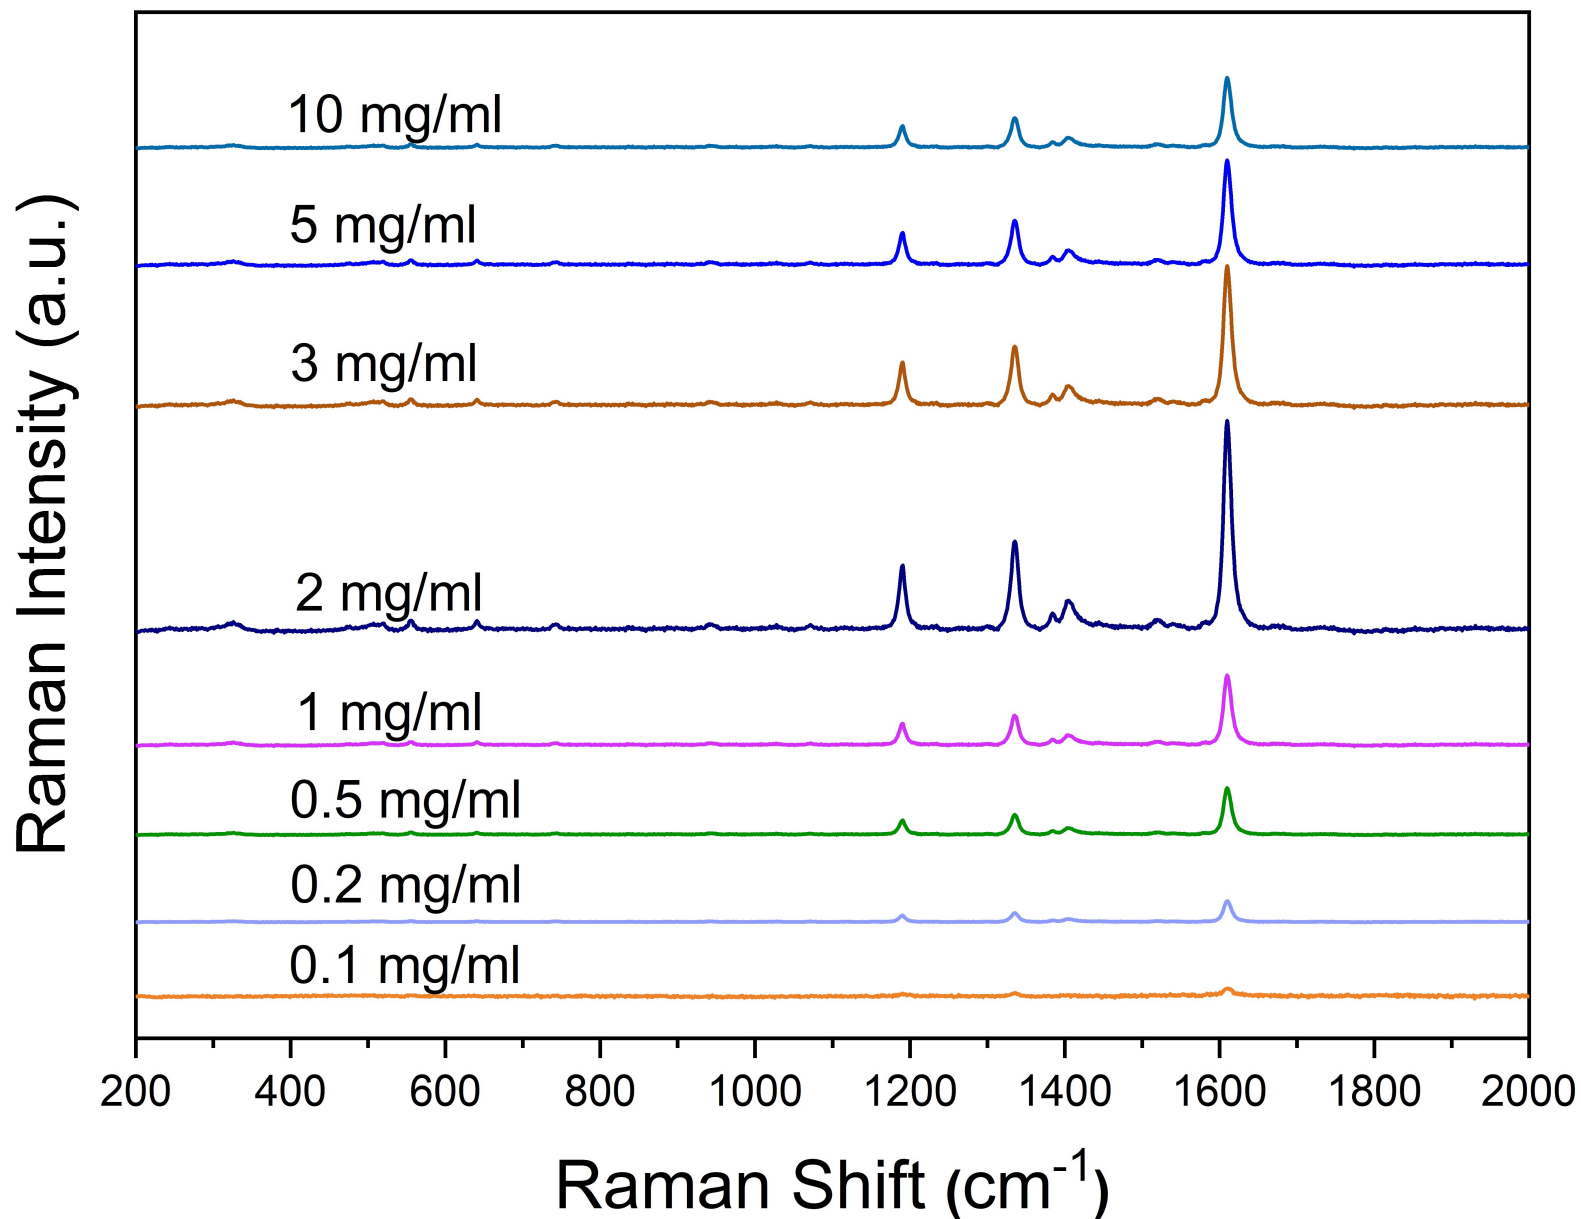

Supplement: d1nj02451e5.pdf [file d1nj02451e5.pdf]

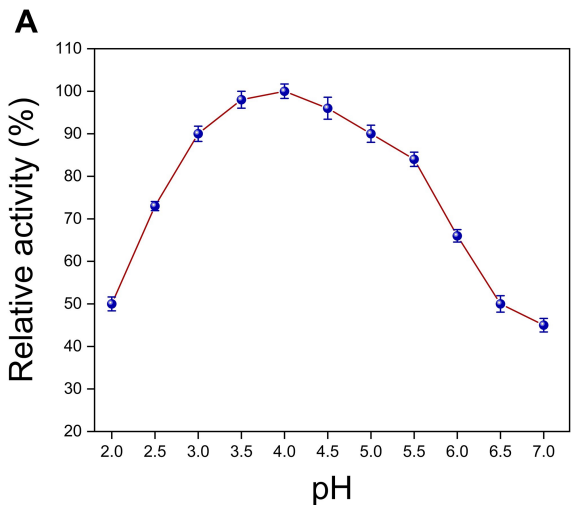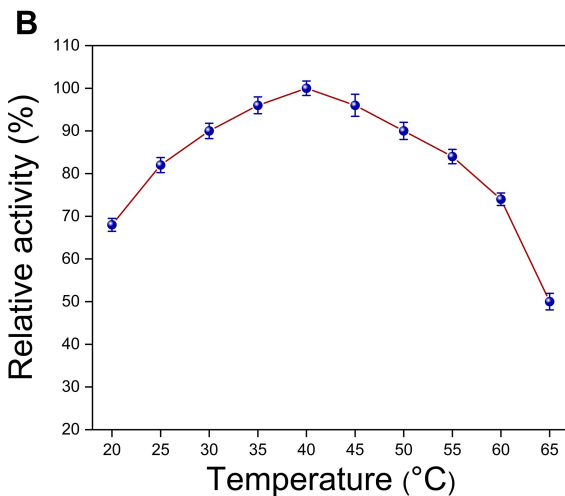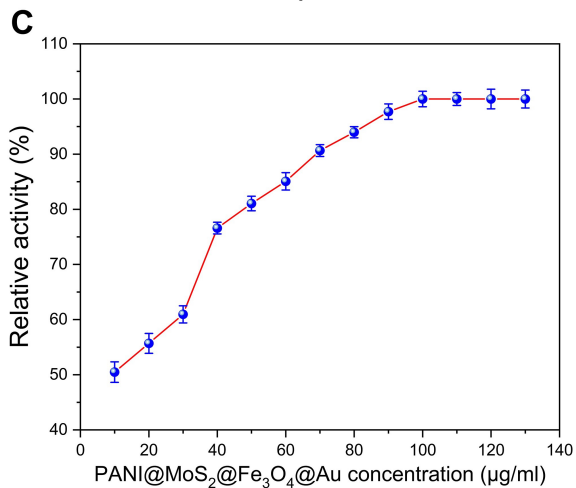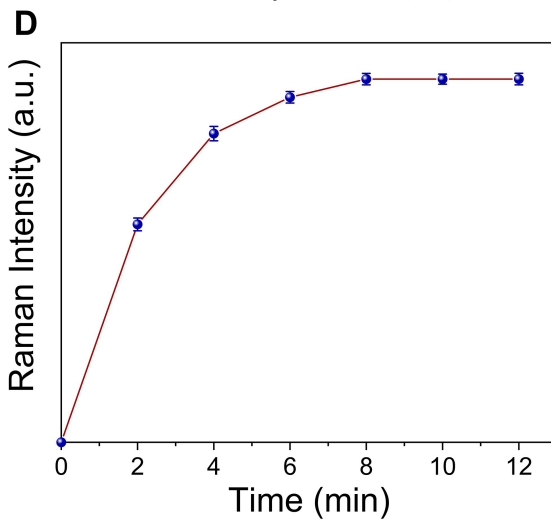

Supplement: d1nj02451e6.pdf [file d1nj02451e6.pdf]

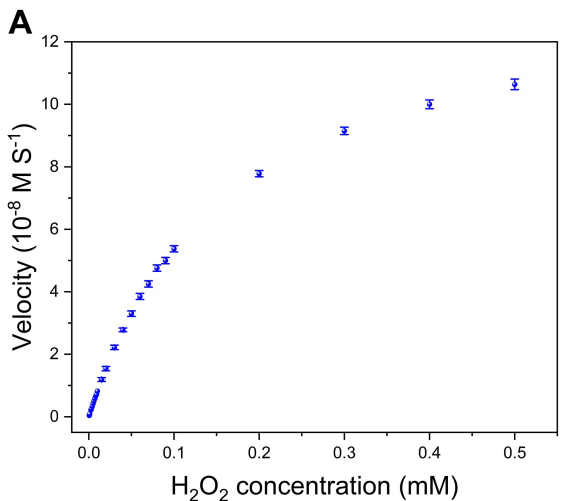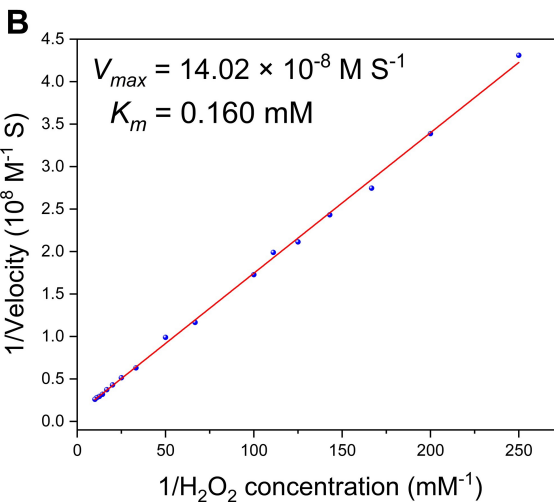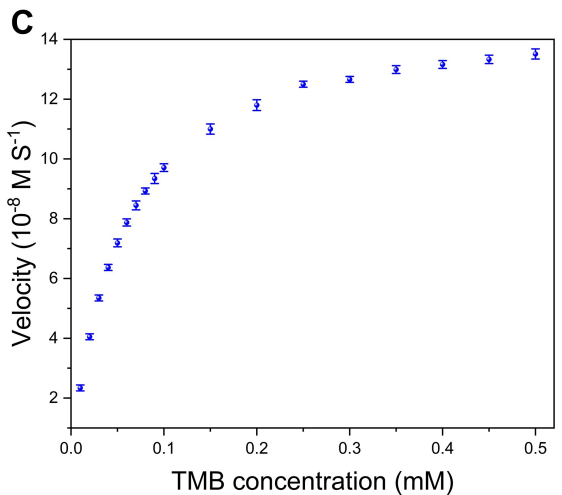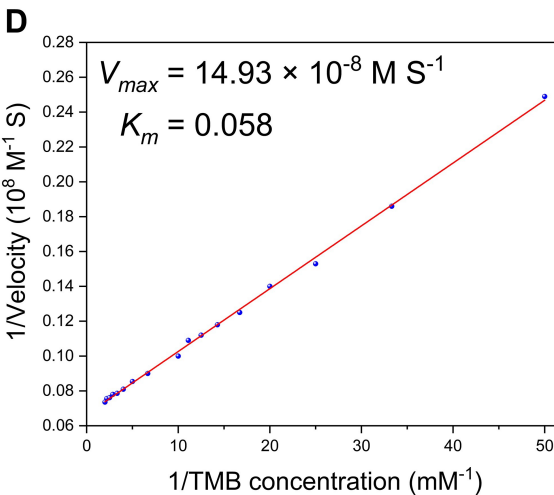

Supplement: d1nj02451e7.pdf [file d1nj02451e7.pdf]

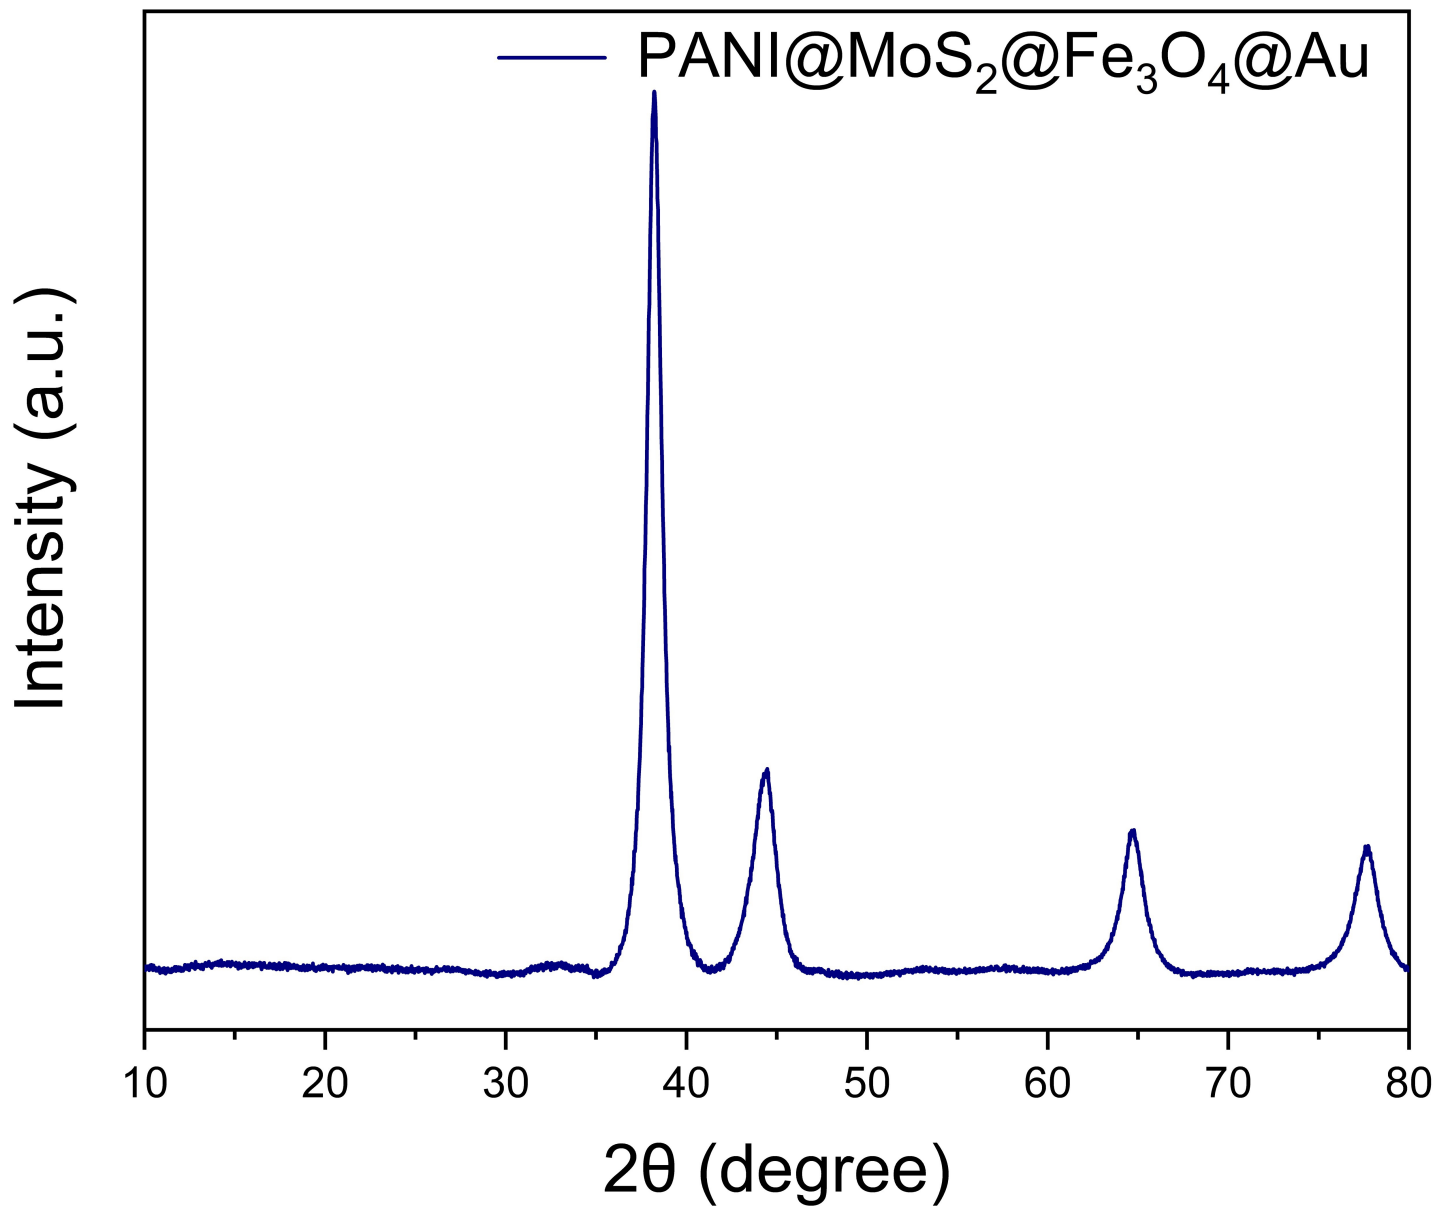

Supplement: d1nj02451e8.pdf [file d1nj02451e8.pdf]

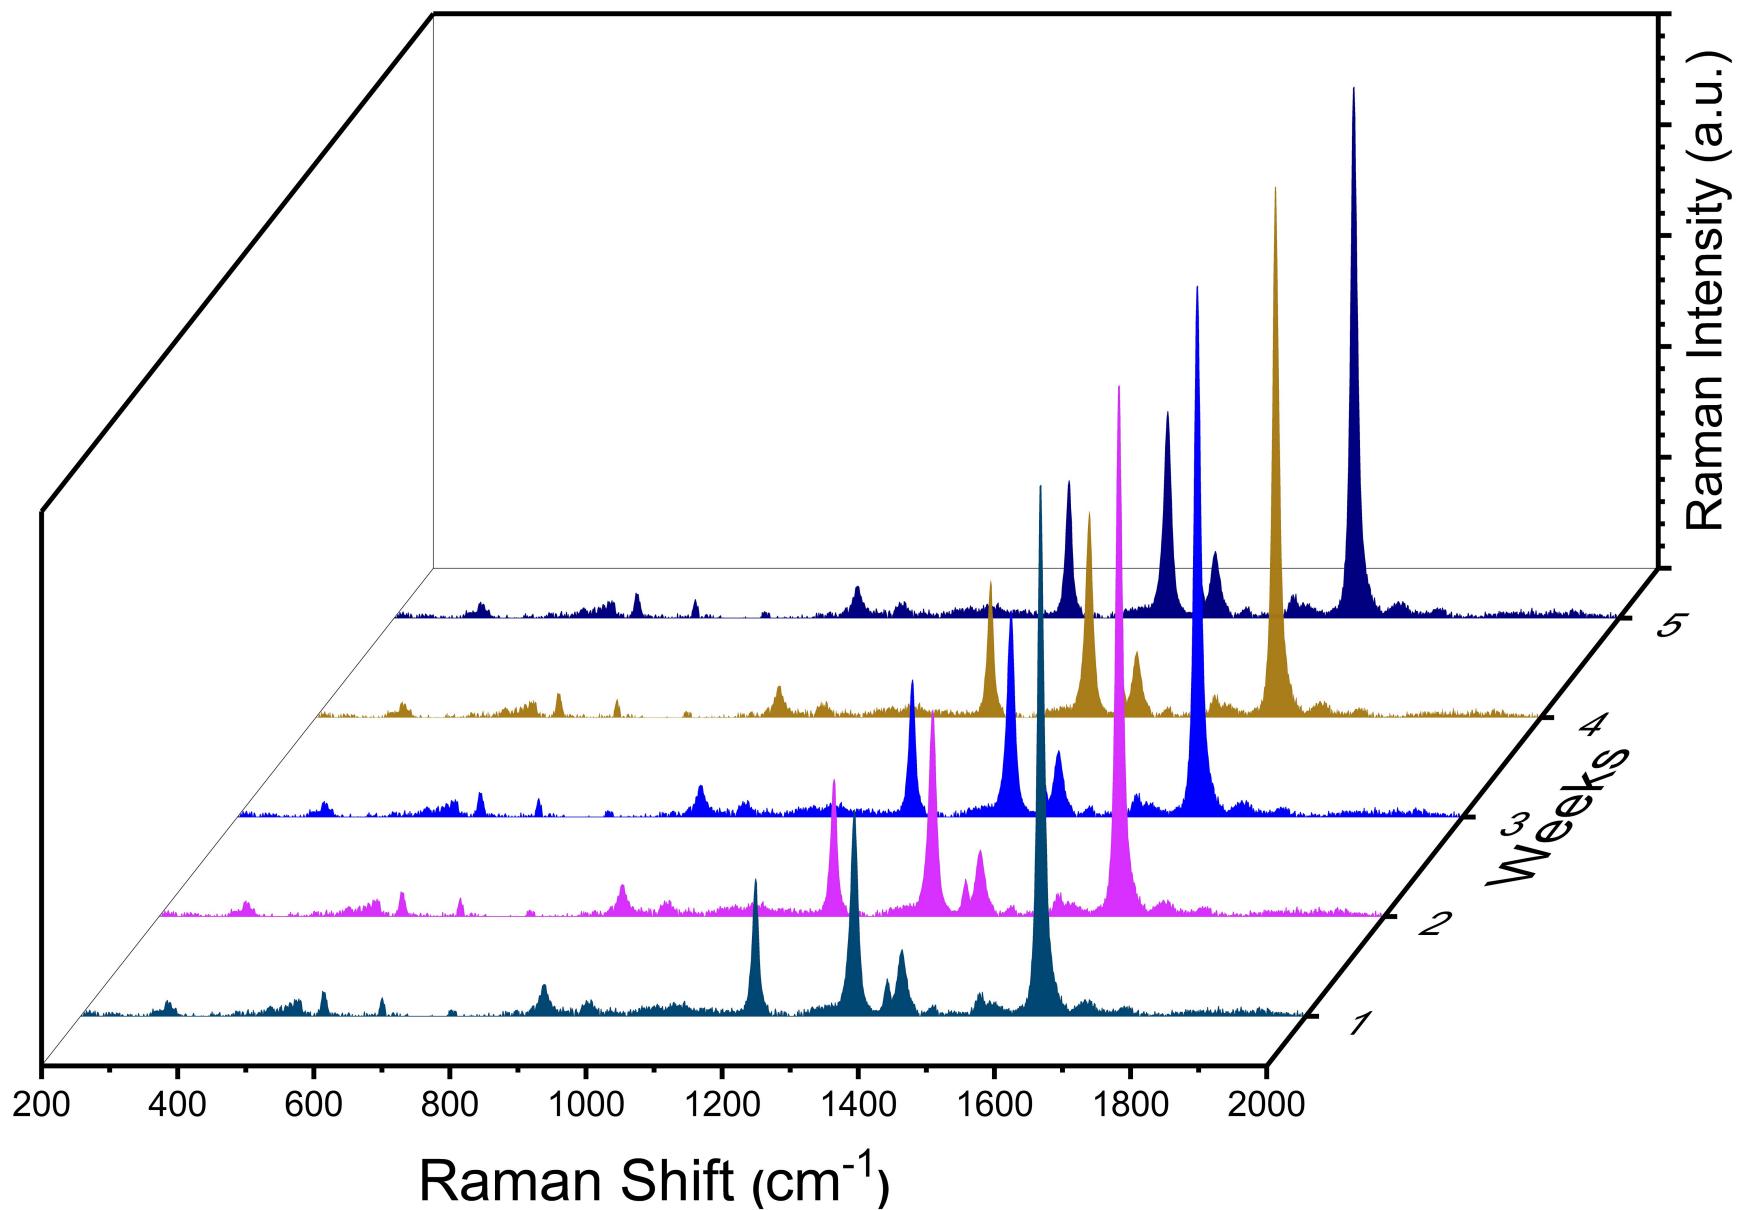

Supplement: d1nj02451e9.pdf [file d1nj02451e9.pdf]
